# Supplementary material for: MSP and GLP-1/Notch signaling coordinately regulate actomyosin-dependent cytoplasmic streaming and oocyte growth in C. elegans
Source: Oxford University Press journal article supplement (doi:10.1242/dev.034603), 2009-06-05
Supplement: dev034603-sup-034603-figs5.pdf [file dev034603-sup-034603-figs5.pdf]

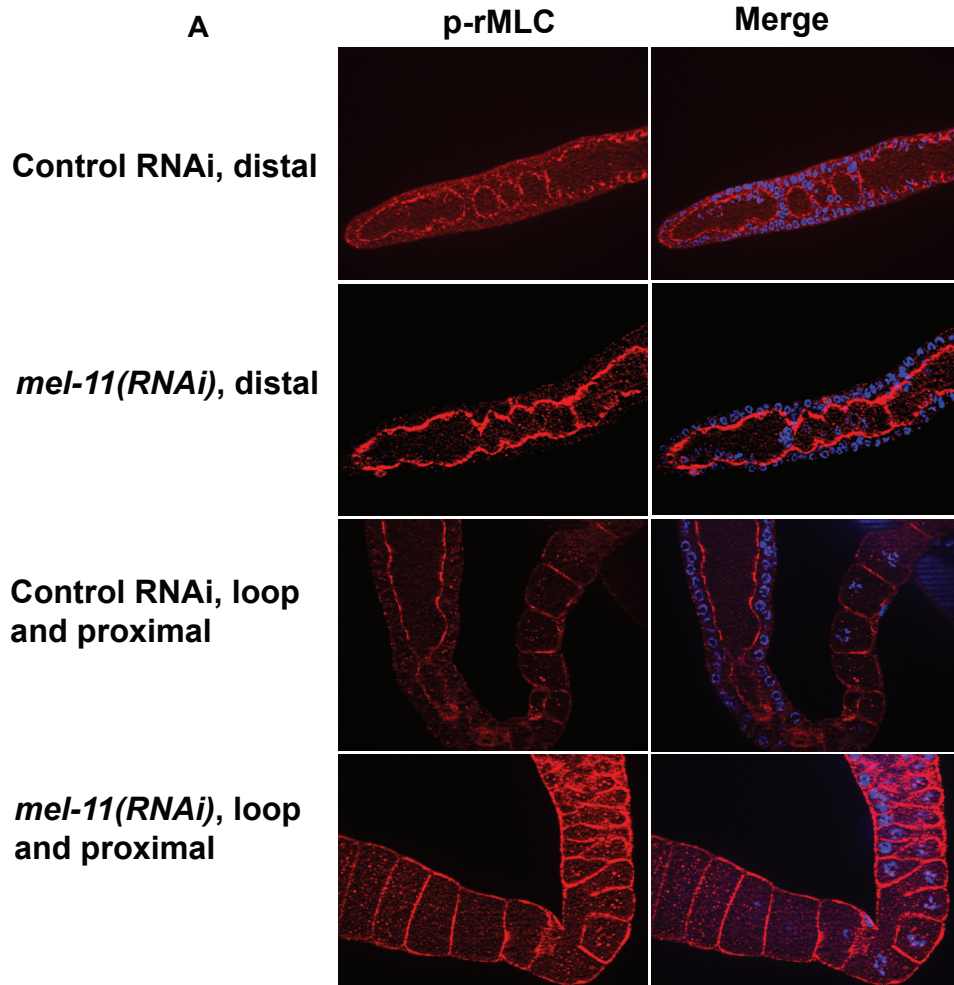

**B**

|          | Quantification of p-rMLC staining<br>in arbitrary fluorescence units |                     |
|----------|----------------------------------------------------------------------|---------------------|
|          | Control RNAi                                                         | <i>mel-11(RNAi)</i> |
| Distal   | 41.46 ± 6.94 (5)                                                     | 79.91 ± 8.06 (5)*   |
| Loop     | 29.55 ± 6.01 (5)                                                     | 44.38 ± 13.17 (6)#  |
| Proximal | 32.92 ± 9.02(5)                                                      | 51.44 ± 12.60 (7)‡  |
