# Supplementary material for: MSP and GLP-1/Notch signaling coordinately regulate actomyosin-dependent cytoplasmic streaming and oocyte growth in C. elegans
Source: Oxford University Press journal article supplement (doi:10.1242/dev.034603), 2009-06-05
Supplement: dev034603-sup-dev034630tables3.pdf [file dev034603-sup-dev034630tables3.pdf]

**Table S3. *apx-1* activity influences the number of nuclei in the germline proliferative zone after the L2 stage in a soma-dependent manner**

| Relevant genotype                        | Time (hours)* | Average $\pm$ s.e.m. | <i>n</i> <sup>†</sup> |
|------------------------------------------|---------------|----------------------|-----------------------|
| <b><i>apx-1(+)</i></b>                   |               |                      |                       |
|                                          | 17            | 21 $\pm$ 1           | 36                    |
|                                          | 24            | 51 $\pm$ 3           | 24                    |
|                                          | 31            | 113 $\pm$ 3          | 39                    |
|                                          | 41            | 212 $\pm$ 11         | 13                    |
|                                          | 48            | 230 $\pm$ 5          | 14                    |
| <b><i>apx-1(or3)</i></b>                 |               |                      |                       |
|                                          | 17            | 20 $\pm$ 3           | 12                    |
|                                          | 24            | 68 $\pm$ 3           | 12                    |
|                                          | 31            | 98 $\pm$ 6           | 18                    |
|                                          | 41            | 166 $\pm$ 26         | 4                     |
|                                          | 48            | 171 $\pm$ 6          | 31                    |
| <b>Control RNAi</b>                      |               |                      |                       |
|                                          | 19            | 22 $\pm$ 1           | 2                     |
|                                          | 48            | 208 $\pm$ 0.5        | 3                     |
| <b><i>apx-1(RNAi)</i></b>                |               |                      |                       |
|                                          | 19            | 23 $\pm$ 0.75        | 4                     |
|                                          | 48            | 120 $\pm$ 4          | 4                     |
| <b><i>rrf-1(pk1417); apx-1(RNAi)</i></b> |               |                      |                       |
|                                          | 24            | 63 $\pm$ 6           | 16                    |
|                                          | 48            | 198 $\pm$ 11         | 16                    |

\*Hours post-hatch at 25°C. Gravid adults laid eggs overnight at 25°C, progeny were synchronized as L1 larvae by hatch-off and placed on the appropriate RNAi plates and scored after staining with DAPI.

<sup>†</sup>Number of gonad arms counted.
