# Supplementary figures and images for: MSP and GLP-1/Notch signaling coordinately regulate actomyosin-dependent cytoplasmic streaming and oocyte growth in C. elegans
Source: Oxford University Press journal article supplement (doi:10.1242/dev.034603), 2009-06-05

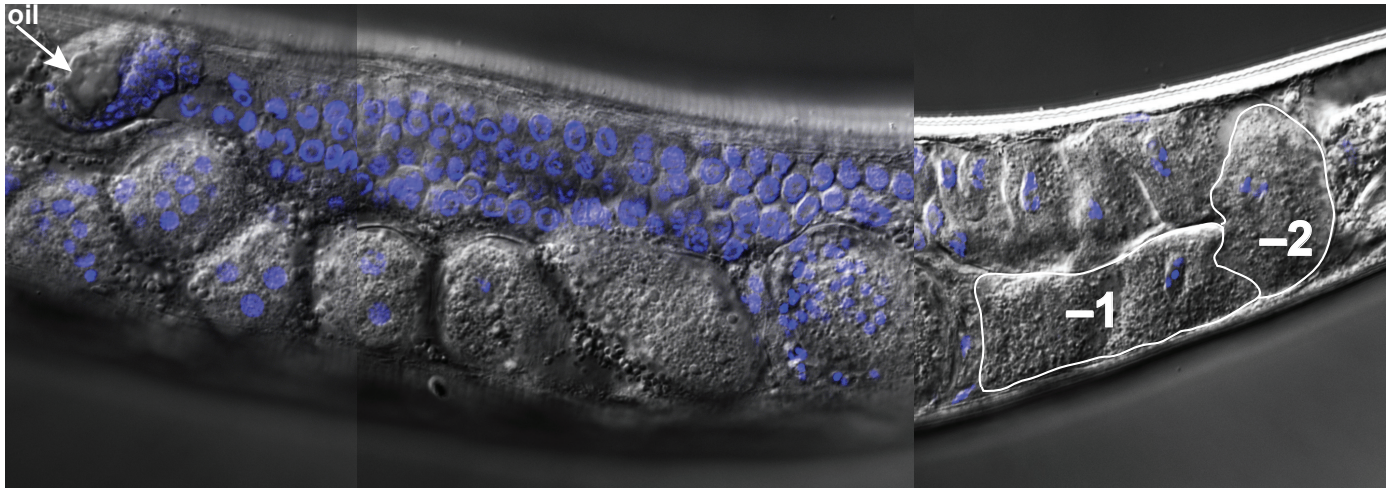

Abnormal distal nuclei

Leptotene/Zygotene nuclei

Pachytene nuclei

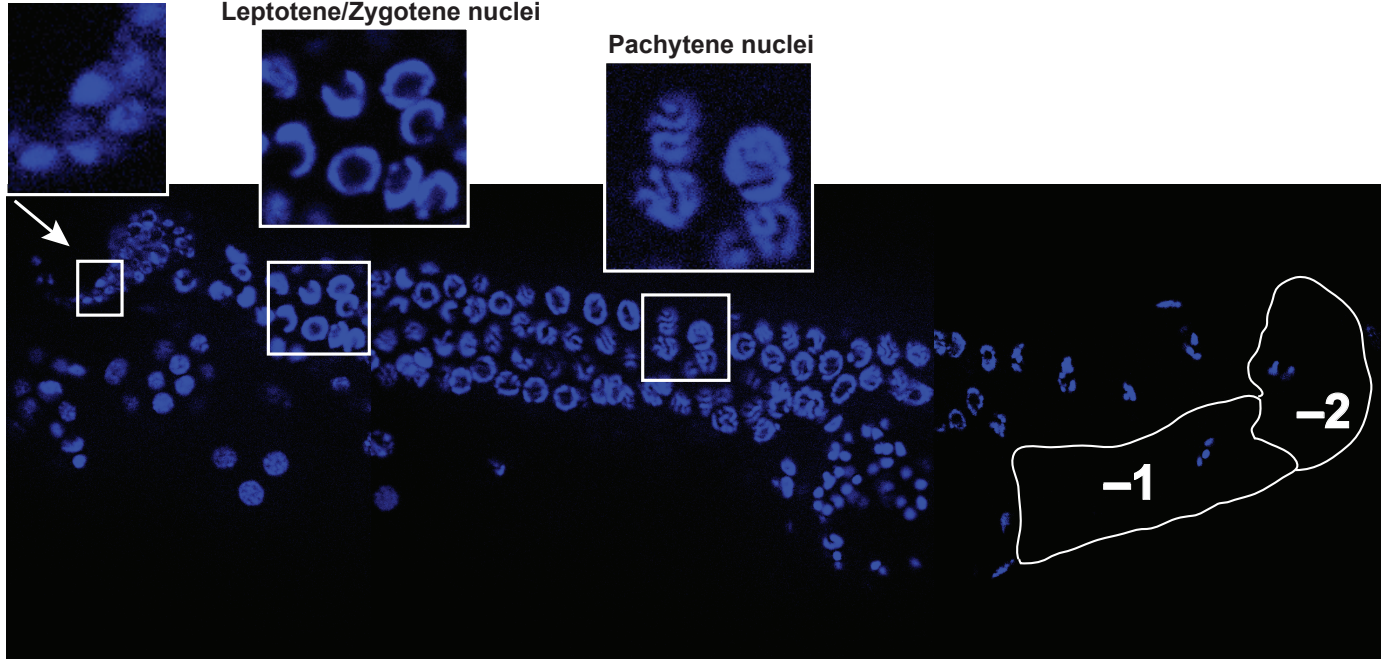

Supplement: dev034603-sup-034603-figs3.pdf [file dev034603-sup-034603-figs3.pdf]

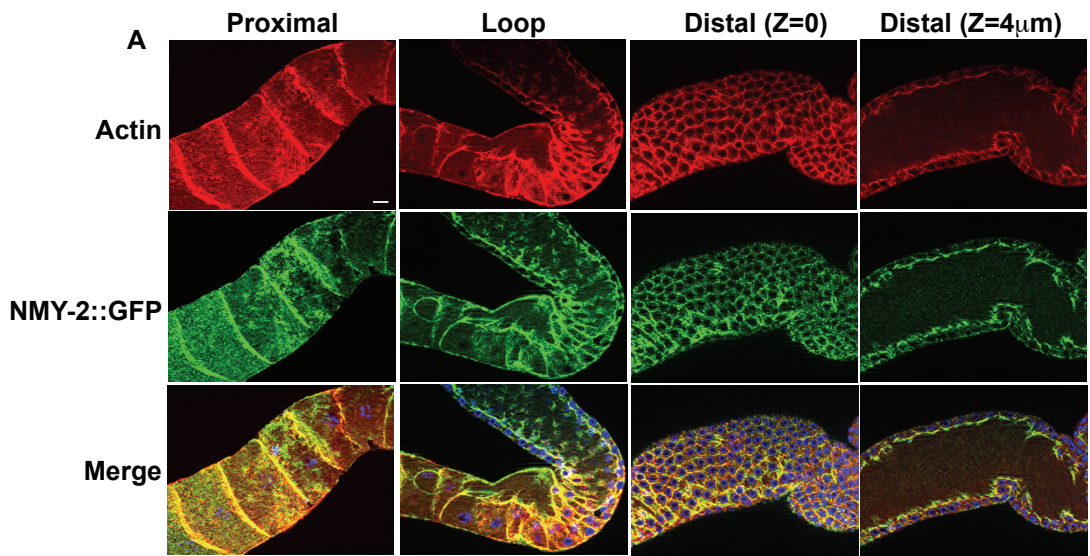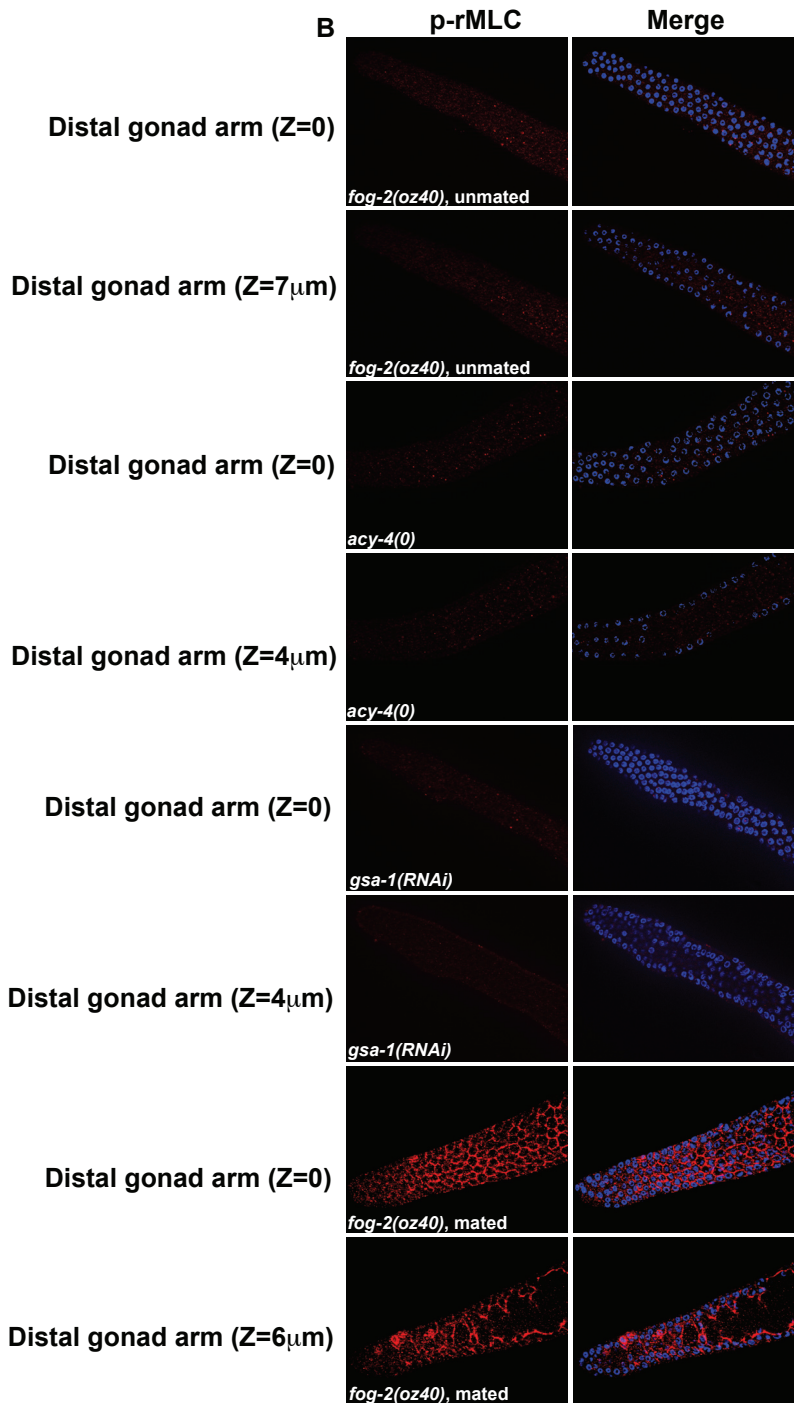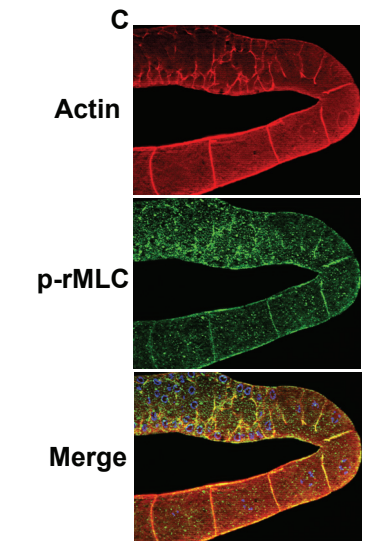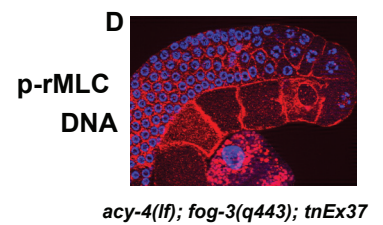

Supplement: dev034603-sup-034603-figs4.pdf [file dev034603-sup-034603-figs4.pdf]
